# Supplementary material for: Associations between pre-pregnancy psychosocial risk factors and infant outcomes: a population-based cohort study in England
Source: PubMed Central journal article supplement (PMC7848754; doi:10.1016/s2468-2667(20)30210-3), 2021-01-28
Supplement: mmc1.pdf [file mmc1.pdf]

# THE LANCET

## Public Health

### Supplementary appendix

This appendix formed part of the original submission and has been peer reviewed.  
We post it as supplied by the authors.

Supplement to: Harron K, Gilbert R, Fagg J, Guttman A, van der Meulen J.  
Associations between pre-pregnancy psychosocial risk factors and infant outcomes:  
a population-based cohort study in England. *Lancet Public Health* 2021; **6**: e97–105.

## Appendix

**Appendix Figure 1: Creation of the analysis cohort**

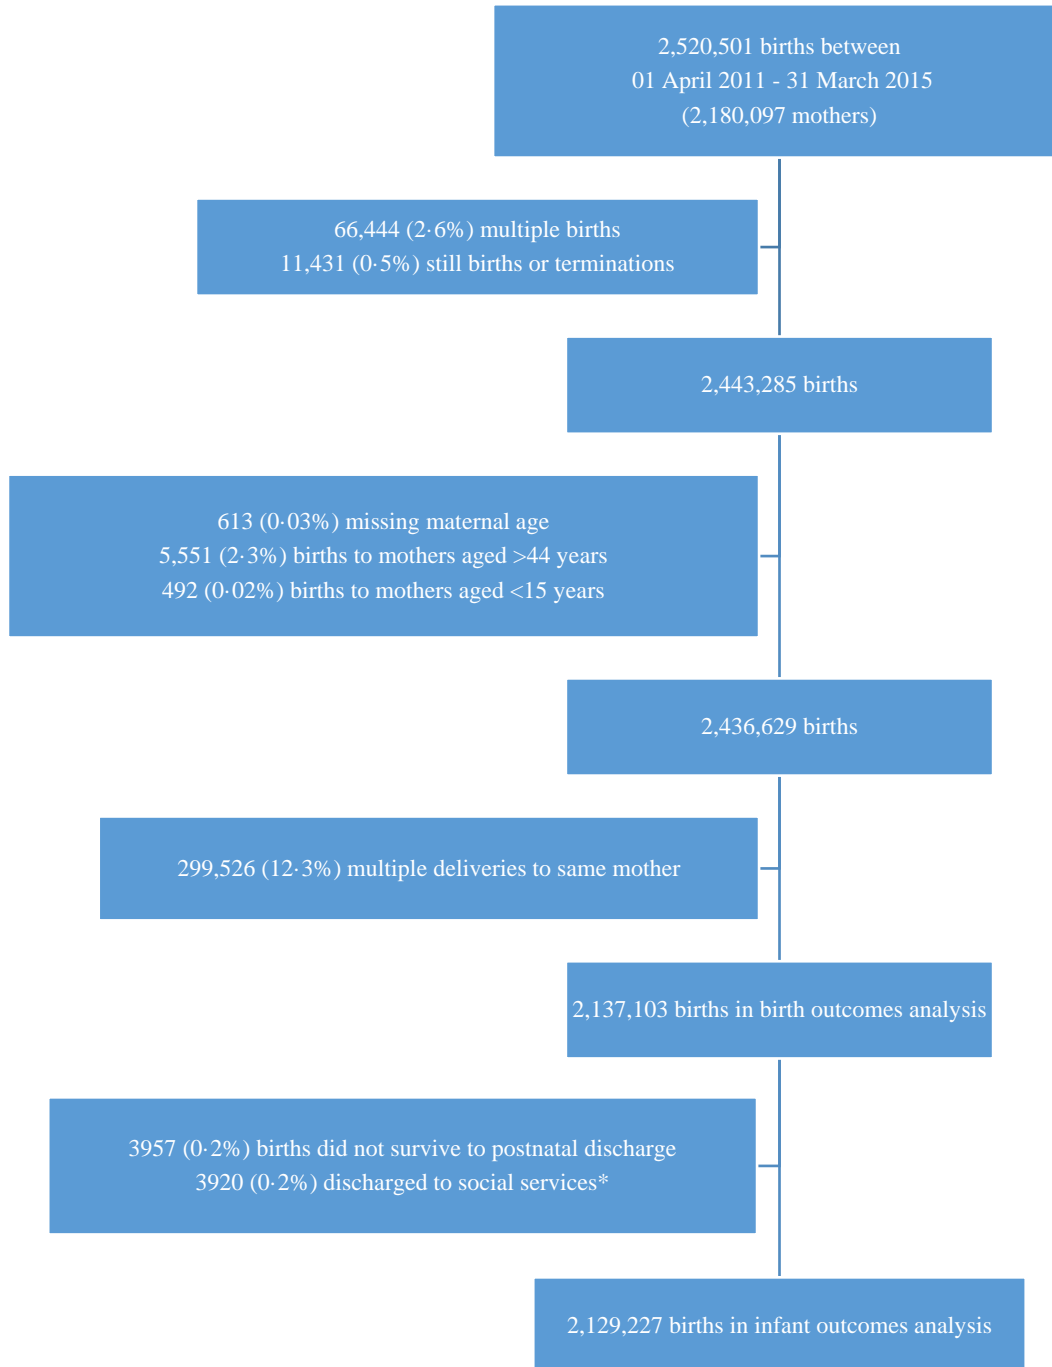

\* Local Authority residential accommodation (i.e. where care is provided) or foster care, according to 'destination on discharge' variable in HES

**Appendix Figure 2: Relationship between maternal age and psychosocial risk-factors identified in the two years prior to 20 weeks of pregnancy.**

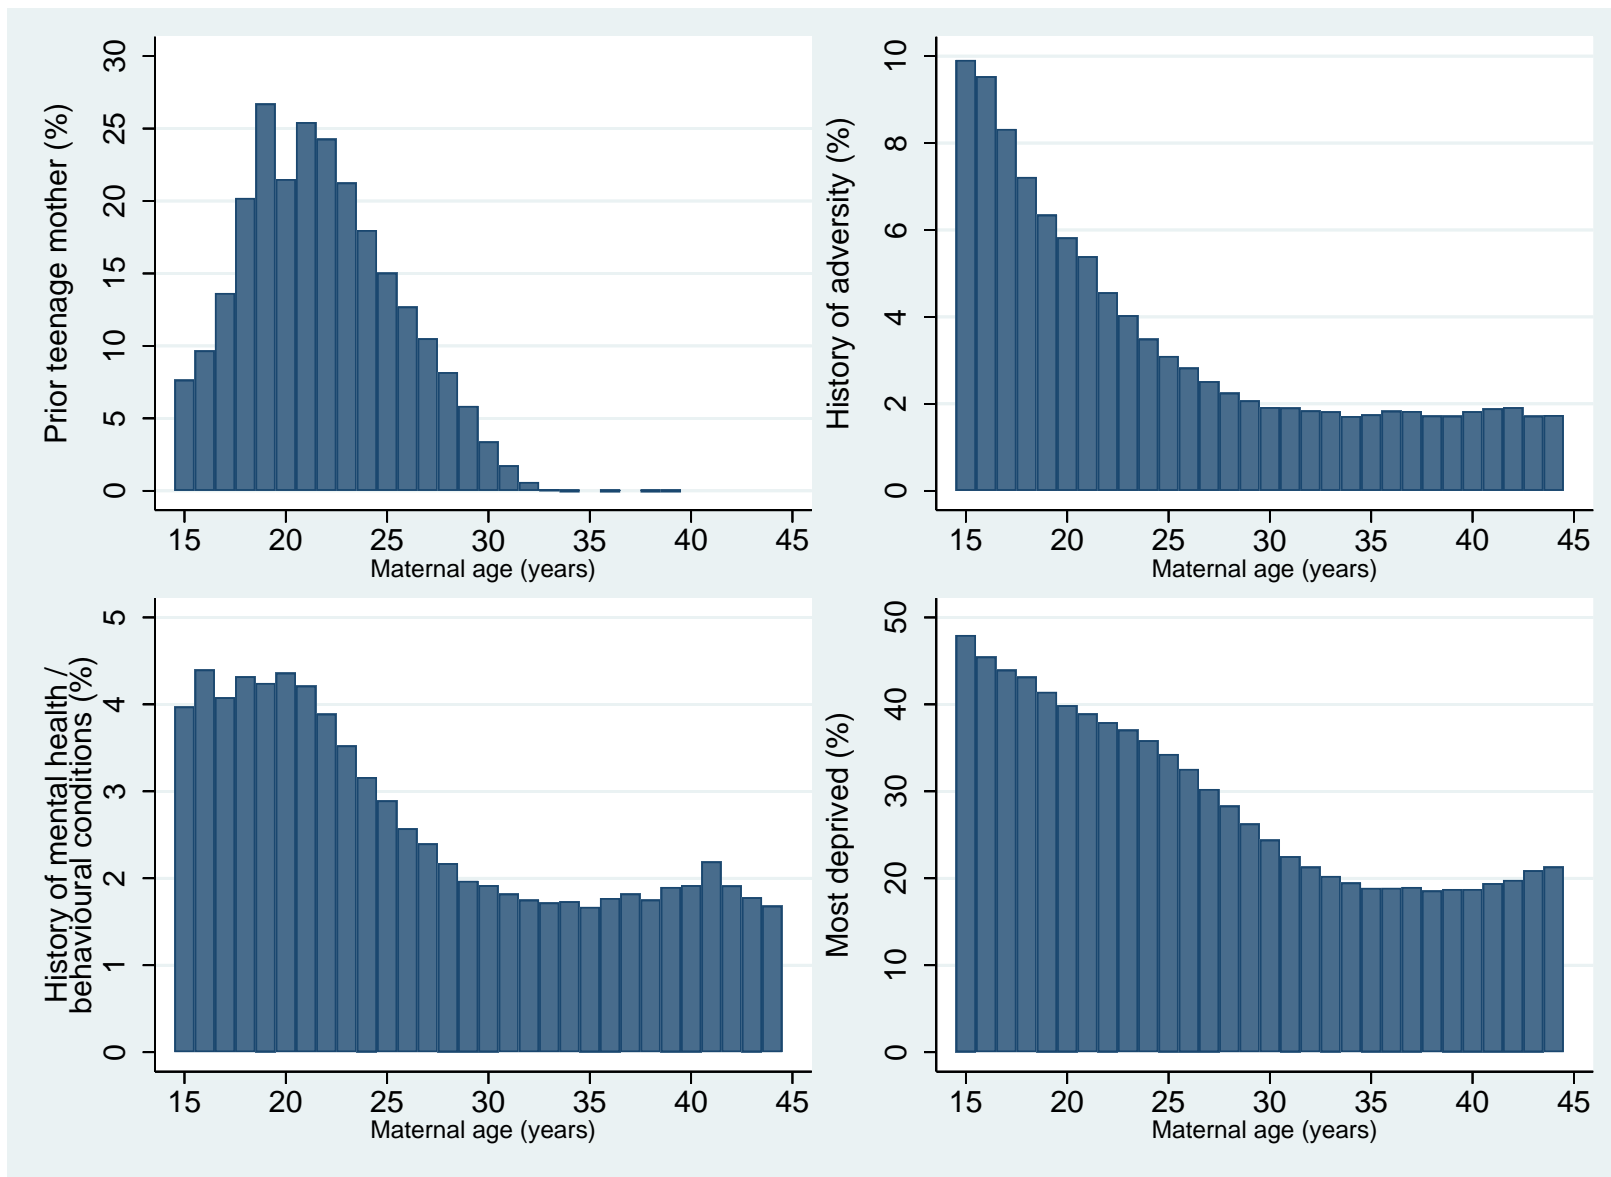

**Appendix Table 1: ICD 10 code lists for risk-factors relating to adversity and mental health / behavioural conditions.**

**Code lists were derived from the following studies:**

Herbert A, Gilbert R, González-Izquierdo A, et al. Violence, self-harm and drug or alcohol misuse in adolescents admitted to hospitals in England for injury: a retrospective cohort study. *BMJ Open*. 2015;5(2):e006079.

Hardelid P, Dattani N, Gilbert R. Estimating the prevalence of chronic conditions in children who die in England, Scotland and Wales: a data linkage cohort study. *BMJ Open*. 2014;4(8).

| Group                               | Description                                                                | ICD10 Code       |
|-------------------------------------|----------------------------------------------------------------------------|------------------|
| <b>Adversity-related admissions</b> |                                                                            |                  |
| Violence                            | Maltreatment syndromes                                                     | T74              |
|                                     | Effects of other deprivation (extreme neglect)                             | T73              |
|                                     | Perpetrator of neglect and other maltreatment syndromes                    | Y06, Y07         |
|                                     | Assault by bodily force and sexual assault                                 | Y04, Y05         |
|                                     | Other types of assault                                                     | X85-Y03, Y08-Y09 |
|                                     | Events of undetermined intent                                              | Y20-Y34          |
|                                     | Examination and observation following other inflicted injury               | Z04.5            |
|                                     | Examination and observation for other reasons: request for expert evidence | Z04.8            |
| Self-harm                           | Sequelae of intentional self-harm                                          | Y87              |
|                                     | Intentional self-poisoning by and exposure to ... drugs                    | X60-X63          |
|                                     | ...other and unspecified drugs, medicaments and biological substances      | X64              |
|                                     | ...alcohol                                                                 | X65              |
|                                     | ...organic solvents and halogenated hydrocarbons and their vapours         | X66              |
|                                     | ...other gases and vapours                                                 | X67              |
|                                     | ...pesticides                                                              | X68              |
|                                     | ...other and unspecified chemicals and noxious substances                  | X69              |
|                                     | Intentional self-harm by... hanging, strangulation and suffocation         | X70              |
|                                     | ...drowning and submersion                                                 | X71              |
|                                     | ...firearm discharge                                                       | X72-X74          |
|                                     | ...explosive material                                                      | X75              |

|                                                            |                                                                         |                          |
|------------------------------------------------------------|-------------------------------------------------------------------------|--------------------------|
|                                                            | ...smoke, fire and flames, or steam, hot vapours and hot objects        | X76-X77                  |
|                                                            | ...sharp/blunt objects                                                  | X78-X79                  |
|                                                            | ...jumping from a high place                                            | X80                      |
|                                                            | ...jumping or lying before a moving object, or crashing a motor vehicle | X81-82                   |
|                                                            | ...other specified means                                                | X83                      |
|                                                            | ...unspecified means                                                    | X84                      |
|                                                            | Personal history of self-harm                                           | Z91.5                    |
| Substance misuse                                           | Mental and behavioural disorders due to psychoactive substance use      | F11-F17, F19 (not F17.1) |
|                                                            | Finding of drugs not normally found in blood                            | R78.1-R78.5              |
|                                                            | Poisoning by drugs, medicaments and biological substances               | T36-T50 (not T50.6)      |
|                                                            | Poisoning, undetermined intent                                          | Y10-Y14                  |
|                                                            | Drug rehabilitation                                                     | Z50.3                    |
|                                                            | Drug abuse counselling and surveillance                                 | Z71.5                    |
|                                                            | Drug use                                                                | Z72.2                    |
|                                                            | Personal history of psychoactive substance abuse                        | Z864                     |
|                                                            | Mental and behavioural disorders due to use of volatile solvents        | F18                      |
|                                                            | Accidental poisoning by and exposure to noxious substances              | X40-X44, X46-X49         |
|                                                            | Poisoning by chemical or noxious substance, undetermined intent         | Y16-Y19                  |
|                                                            | Special epileptic syndromes - (related to alcohol, drugs, etc.)         | G40.5                    |
|                                                            | Blood-alcohol and blood-drug test                                       | Z04.0                    |
|                                                            | Alcohol-induced pseudo-Cushing's syndrome                               | E24.4                    |
|                                                            | Mental and behavioural disorders due to use of alcohol                  | F10                      |
|                                                            | Degeneration of nervous system due to alcohol                           | G31.2                    |
|                                                            | Alcoholic polyneuropathy                                                | G62.1                    |
|                                                            | Alcoholic myopathy                                                      | G72.1                    |
|                                                            | Alcoholic cardiomyopathy                                                | I42.6                    |
|                                                            | Alcoholic gastritis                                                     | K29.2                    |
|                                                            | Alcoholic liver disease                                                 | K70                      |
|                                                            | Alcohol-induced acute pancreatitis                                      | K85.2                    |
|                                                            | Alcohol-induced chronic pancreatitis                                    | K86.0                    |
| Maternal care for (suspected) damage to fetus from alcohol | O35.4                                                                   |                          |

|                                                          |                                                                                               |         |
|----------------------------------------------------------|-----------------------------------------------------------------------------------------------|---------|
|                                                          | Finding of alcohol in blood                                                                   | R78.0   |
|                                                          | Poisoning: antidotes and chelating agents, not elsewhere classified                           | T50.6   |
|                                                          | Toxic effect of alcohol                                                                       | T51     |
|                                                          | Accidental poisoning by exposure to alcohol                                                   | X45     |
|                                                          | Poisoning by exposure to alcohol, undetermined intent                                         | Y15     |
|                                                          | Evidence of alcohol involvement determined by blood alcohol level                             | Y90     |
|                                                          | Evidence of alcohol involvement determined by level of intoxication                           | Y91     |
|                                                          | Alcohol rehabilitation                                                                        | Z50.2   |
|                                                          | Alcohol abuse counselling and surveillance                                                    | Z71.4   |
|                                                          | Alcohol use                                                                                   | Z72.1   |
| <b>Mental health conditions / behavioural disorders*</b> |                                                                                               |         |
|                                                          | Organic, including symptomatic, mental disorders                                              | F00-F09 |
|                                                          | Schizophrenia, schizotypal and delusional disorders                                           | F20-F29 |
|                                                          | Mood [affective] disorders                                                                    | F30-F39 |
|                                                          | Neurotic, stress-related and somatoform disorders                                             | F40-F48 |
|                                                          | Behavioural syndromes associated with physiological disturbances and physical factors         | F50-F59 |
|                                                          | Disorders of adult personality and behaviour                                                  | F60-F69 |
|                                                          | Mental retardation                                                                            | F70-F79 |
|                                                          | Disorders of psychological development                                                        | F80-F89 |
|                                                          | Behavioural and emotional disorders with onset usually occurring in childhood and adolescence | F90-F98 |
|                                                          | Unspecified mental disorder                                                                   | F99     |
|                                                          | Sedatives, hypnotics and antianxiety drugs                                                    | Y47     |
|                                                          | Psychotropic drugs, not elsewhere classified                                                  | Y49     |
|                                                          | Personal history of other mental and behavioural disorders                                    | Z865    |

\* Excluding those that fall under adversity (e.g. relating to self-harm or substance misuse)

**Appendix Table 2: Code lists for risk-factors relating to pregnancy, delivery and birth.**

**Code lists were derived from the following study:**

Harron K, Gilbert R, Cromwell D, et al. International comparison of emergency hospital use for infants: data linkage cohort study in Ontario and England. *BMJ Qual Saf.* 2018;27(1):31-9.

| Group                         | Type        | Description                                      | ICD10 codes                                                                                                                                                                                                                                                                                                                                                                                                                                                                   |
|-------------------------------|-------------|--------------------------------------------------|-------------------------------------------------------------------------------------------------------------------------------------------------------------------------------------------------------------------------------------------------------------------------------------------------------------------------------------------------------------------------------------------------------------------------------------------------------------------------------|
| Pregnancy risk-factor         | ICD10 codes | Intrauterine fetal death                         | O364, P95                                                                                                                                                                                                                                                                                                                                                                                                                                                                     |
|                               |             | Eclampsia                                        | O14, O15                                                                                                                                                                                                                                                                                                                                                                                                                                                                      |
| Pregnancy risk-factor         | ICD10 codes | Gestational hypertension                         | O13, O16                                                                                                                                                                                                                                                                                                                                                                                                                                                                      |
|                               |             | Placental abruption or infarction                | O45, O431, O438, O439                                                                                                                                                                                                                                                                                                                                                                                                                                                         |
| Pregnancy risk-factor         | ICD10 codes | Uterine rupture                                  | O710, O711                                                                                                                                                                                                                                                                                                                                                                                                                                                                    |
|                               |             | Diabetes in pregnancy                            | P700, O24, E10-E14                                                                                                                                                                                                                                                                                                                                                                                                                                                            |
| Delivery risk-factor          | ICD10 codes | Birth trauma                                     | P10-P15                                                                                                                                                                                                                                                                                                                                                                                                                                                                       |
|                               |             | Complications of delivery                        | P03                                                                                                                                                                                                                                                                                                                                                                                                                                                                           |
| Delivery risk-factor          | ICD10 codes | Hypoxia                                          | P20-P21                                                                                                                                                                                                                                                                                                                                                                                                                                                                       |
|                               |             | Amniotic fluid embolism                          | O881                                                                                                                                                                                                                                                                                                                                                                                                                                                                          |
| Delivery risk-factor          | ICD10 codes | Chorioamnionitis                                 | O411 P027-P029                                                                                                                                                                                                                                                                                                                                                                                                                                                                |
|                               |             | Umbilical cord problem                           | P020, P024-P026                                                                                                                                                                                                                                                                                                                                                                                                                                                               |
| Delivery risk-factor          | ICD10 codes | Fetal hemorrhage                                 | P50, P51, P53, P54                                                                                                                                                                                                                                                                                                                                                                                                                                                            |
|                               |             | Maternal hemorrhage                              | O430                                                                                                                                                                                                                                                                                                                                                                                                                                                                          |
| Delivery risk-factor          | ICD10 codes | Umbilical cord prolapse                          | O69                                                                                                                                                                                                                                                                                                                                                                                                                                                                           |
|                               |             |                                                  |                                                                                                                                                                                                                                                                                                                                                                                                                                                                               |
| Neonatal medical condition    | ICD10 codes | Congenital anomalies                             | Q00 Q01 Q02 Q03 Q04 Q05 Q06 Q07 Q20 Q212 Q213 Q214 Q218 Q219 Q22 Q23 Q24 Q251 Q252 Q253 Q254 Q255 Q256 Q257 Q258 Q259 Q26 Q282 Q283 Q289 Q30 Q31 Q32 Q33 Q34 Q390 Q391 Q392 Q393 Q394 Q41 Q42 Q43 Q44 Q45 Q60 Q61 Q62 Q63 Q64 Q722 Q750 Q752 Q759 Q760 Q761 Q762 Q764 Q765 Q766 Q767 Q77 Q780 Q781 Q782 Q783 Q784 Q788 Q789 Q790 Q791 Q792 Q793 Q794 Q795 Q799 Q81 Q851 Q871 Q872 Q873 Q874 Q878 Q879 Q897 Q899 Q909 Q913 Q914 Q917 Q928 Q93 Q950 Q969 Q97 Q98 Q992 Q998 Q999 |
|                               | ICD10 codes | Complex chronic conditions                       | B20-B23, D55, D561, D562, D570-D572, D58, D80-D84, D898, D899, E343, E70-E730, E74, E76-E79, E803-E807, E83-E85, E881, E882, E888, E889, F70, F72, F73, F842, G10-G12, G20, G23, G240-G242, G248, G250-G256, G318, G319, G40, G41, G71, G72, G80-G82, G901, G903, G904, G91, G940-G942, G95, G99, I42, I44, I45, I47-I49, I515, K44, K50-K51, K73-K74, K754, K758-K760, M41, N18, P27, P90                                                                                    |
| Delivery by caesarean section | OPCS codes  | Elective caesarean delivery                      | R17                                                                                                                                                                                                                                                                                                                                                                                                                                                                           |
|                               | OPCS codes  | Other caesarean delivery                         | R18                                                                                                                                                                                                                                                                                                                                                                                                                                                                           |
| Delivery by caesarean section | ICD10 codes | Single delivery by caesarean section             | O82                                                                                                                                                                                                                                                                                                                                                                                                                                                                           |
|                               |             | Multiple delivery, all by caesarean section      | O842                                                                                                                                                                                                                                                                                                                                                                                                                                                                          |
| Delivery by caesarean section | ICD10 codes | Fetus and newborn affected by caesarean delivery | P034                                                                                                                                                                                                                                                                                                                                                                                                                                                                          |

**Appendix Table 3: Characteristics of study population: relationship between maternal age and psychosocial risk-factors identified in the two years prior to 20 weeks of pregnancy.**

|                                                                          | Maternal age (years) |         |        |       |         |        |         |        |         |        |         |        |
|--------------------------------------------------------------------------|----------------------|---------|--------|-------|---------|--------|---------|--------|---------|--------|---------|--------|
|                                                                          | Total                |         | 15-19  |       | 20-24   |        | 25-29   |        | 30-34   |        | 35-44   |        |
|                                                                          | N                    | %       | N      | %     | N       | %      | N       | %      | N       | %      | N       | %      |
| <b>Total (row %)</b>                                                     | 2,137,103            | (100.0) | 93,279 | (4.4) | 365,908 | (17.1) | 598,484 | (28.0) | 644,083 | (30.1) | 435,349 | (20.4) |
| <b>Any risk-factor*</b>                                                  | 759,397              | 35.5    | 93,279 | 100.0 | 190,707 | 52.1   | 225,778 | 37.7   | 157,344 | 24.4   | 92,289  | 21.2   |
| Any risk-factor excluding deprivation                                    | 306,208              | 14.3    | 93,279 | 100.0 | 94,829  | 25.9   | 78,840  | 13.2   | 26,300  | 4.1    | 12,960  | 3.0    |
| <b>Prior teenage mother</b>                                              | 168,186              | 7.9     | 19,529 | 20.9  | 79,712  | 21.8   | 60,984  | 10.2   | 7957    | 1.2    | <5      | 0.0    |
| <b>History of adversity related admissions</b>                           | 58,107               | 2.7     | 6765   | 7.3   | 16,453  | 4.5    | 15,123  | 2.5    | 11,940  | 1.9    | 7826    | 1.8    |
| <b>History of admissions for mental health or behavioural conditions</b> | 51,312               | 2.4     | 3960   | 4.3   | 13,705  | 3.8    | 14,220  | 2.4    | 11,558  | 1.8    | 7869    | 1.8    |
| History of adversity OR mental health / behavioural conditions           | 85,811               | 4.0     | 7903   | 8.5   | 22,761  | 6.2    | 23,168  | 3.9    | 19,022  | 3.0    | 12,957  | 3.0    |
| <b>National quintile of deprivation</b>                                  |                      |         |        |       |         |        |         |        |         |        |         |        |
| Least deprived                                                           | 320,896              | 15.0    | 6009   | 6.4   | 29,757  | 8.1    | 71,843  | 12.0   | 118943  | 18.5   | 94,344  | 21.7   |
| 2                                                                        | 341,761              | 16.0    | 9146   | 9.8   | 42,476  | 11.6   | 87,164  | 14.6   | 117941  | 18.3   | 85,034  | 19.5   |
| 3                                                                        | 396,818              | 18.6    | 14,271 | 15.3  | 61,968  | 16.9   | 111,592 | 18.6   | 125772  | 19.5   | 83,215  | 19.1   |
| 4                                                                        | 480,889              | 22.5    | 23,397 | 25.1  | 91,707  | 25.1   | 143,823 | 24.0   | 136684  | 21.2   | 85,278  | 19.6   |
| Most deprived                                                            | 580,631              | 27.2    | 39,949 | 42.8  | 137,872 | 37.7   | 180,244 | 30.1   | 139905  | 21.7   | 82,661  | 19.0   |
| Missing                                                                  | 16,108               | 0.8     | 507    | 0.5   | 2128    | 0.6    | 3818    | 0.6    | 4838    | 0.8    | 4817    | 1.1    |
| <b>Primiparous</b>                                                       | 877,431              | 41.1    | 73,750 | 79.1  | 192,359 | 52.6   | 253,910 | 42.4   | 234808  | 36.5   | 122,604 | 28.2   |
| <b>Ethnicity</b>                                                         |                      |         |        |       |         |        |         |        |         |        |         |        |
| White                                                                    | 1,510,146            | 70.7    | 76,252 | 81.7  | 275,796 | 75.4   | 411,518 | 68.8   | 444,667 | 69.0   | 301,913 | 69.3   |
| Mixed                                                                    | 98,991               | 4.6     | 5166   | 5.5   | 17,596  | 4.8    | 24,304  | 4.1    | 28,179  | 4.4    | 22,746  | 5.2    |
| Asian                                                                    | 225,149              | 10.5    | 1877   | 2.0   | 28,356  | 7.7    | 78,094  | 13.0   | 76,714  | 11.9   | 40,108  | 9.2    |
| Black                                                                    | 99,589               | 4.7     | 2729   | 2.9   | 13,050  | 3.6    | 27,326  | 4.6    | 30,773  | 4.8    | 25,711  | 5.9    |
| Other                                                                    | 64,187               | 3.0     | 1685   | 1.8   | 8748    | 2.4    | 18,066  | 3.0    | 20,615  | 3.2    | 15,073  | 3.5    |
| Unknown                                                                  | 139,041              | 6.5     | 5570   | 6.0   | 22,362  | 6.1    | 38,176  | 6.4    | 43,135  | 6.7    | 29,798  | 6.8    |

\*Current or previous teenage birth, history of adversity or mental health / behavioural conditions, or living in the most deprived areas



**Appendix Table 4: Relationship between maternal age and psychosocial risk-factors identified within 1, 2 and 5 years prior to 20 weeks of pregnancy**

|                                                           | Maternal age (years) |                 |                   |                   |                   |                   |
|-----------------------------------------------------------|----------------------|-----------------|-------------------|-------------------|-------------------|-------------------|
|                                                           | Total                | 15-19           | 20-24             | 25-29             | 30-34             | 35-44             |
|                                                           | N %                  | N %             | N %               | N %               | N %               | N %               |
| <b>Total (row %)</b>                                      | 2,137,103<br>(100%)  | 93,279<br>(4.4) | 365,908<br>(17.1) | 598,484<br>(28.0) | 644,083<br>(30.1) | 435,349<br>(20.4) |
| <b>History of mental health or behavioural conditions</b> |                      |                 |                   |                   |                   |                   |
| 1 year look back period                                   | 26,967 1.3           | 2300 2.5        | 7456 2.0          | 7424 1.2          | 5865 0.9          | 3922 0.9          |
| 2 year look back period                                   | 51,312 2.4           | 3960 4.3        | 13,705 3.8        | 14,220 2.4        | 11,558 1.8        | 7869 1.8          |
| 5 year look back period                                   | 89,923 4.2           | 6177 6.6        | 22,715 6.2        | 25,663 4.3        | 20,867 3.2        | 14,501 3.3        |
| <b>History of adversity</b>                               |                      |                 |                   |                   |                   |                   |
| 1 year look back period                                   | 29,049 1.4           | 3630 3.9        | 8365 2.3          | 7604 1.3          | 5727 0.9          | 3723 0.9          |
| 2 year look back period                                   | 58,107 2.7           | 6765 7.3        | 16,453 4.5        | 15,123 2.5        | 11,940 1.9        | 7826 1.8          |
| 5 year look back period                                   | 117,416 5.5          | 11,574 12.4     | 33,012 9.0        | 31,942 5.3        | 24,777 3.9        | 16,111 3.7        |

**Appendix Table 5: Crude and adjusted<sup>^</sup> risk differences and relative risks for birth weight, and unplanned injury admissions and mortality within 12 months of postnatal discharge.** Comparisons are between mothers with each risk-factor identified in the two years prior to 20 weeks of pregnancy, and mothers without that specific risk-factor.

|                                                                      |                                                   | Risk difference (95% CI) |                      | Relative risk <sup>§</sup> (95% CI) |                   |
|----------------------------------------------------------------------|---------------------------------------------------|--------------------------|----------------------|-------------------------------------|-------------------|
| <i>Birth outcomes (N = 2,137,103)</i>                                |                                                   | Crude                    | Adjusted             | Crude                               | Adjusted          |
| Birth weight (grams)                                                 | Teenage mothers                                   | 128.9 (121.4, 136.4)     | 91.4 (85.5, 97.4)    | 1.46 (1.40, 1.51)                   | 1.24 (1.19, 1.28) |
|                                                                      | Prior teenage mothers                             | 38.3 (32.2, 44.4)        | 65.6 (60.1, 71.0)    | 1.20 (1.17, 1.24)                   | 1.33 (1.30, 1.37) |
|                                                                      | History of adversity                              | 101.8 (89.7, 113.9)      | 65.0 (54.6, 75.4)    | 1.66 (1.58, 1.74)                   | 1.35 (1.29, 1.42) |
|                                                                      | History of mental health / behavioural conditions | 135.7 (124.4, 147.1)     | 124.2 (114.2, 134.2) | 1.83 (1.75, 1.92)                   | 1.63 (1.56, 1.70) |
|                                                                      | Most deprived                                     | 97.4 (87.4, 107.5)       | 62.0 (56.9, 67.1)    | 1.43 (1.39, 1.48)                   | 1.32 (1.28, 1.36) |
| <i>Outcomes in 12 months from postnatal discharge (N=2,129,227 )</i> |                                                   |                          |                      |                                     |                   |
| Unplanned injury admissions <sup>+</sup> (%)                         | Teenage mothers                                   | 3.7 (3.4, 4.0)           | 3.6 (3.3, 3.9)       | 2.20 (2.11, 2.29)                   | 2.18 (2.09, 2.27) |
|                                                                      | Prior teenage mothers                             | 2.0 (1.9, 2.2)           | 0.6 (0.5, 0.8)       | 1.57 (1.53, 1.62)                   | 1.09 (1.06, 1.12) |
|                                                                      | History of adversity                              | 1.4 (2.2, 2.7)           | 1.1 (0.9, 1.3)       | 1.66 (1.60, 1.73)                   | 1.24 (1.19, 1.28) |
|                                                                      | History of mental health / behavioural conditions | 2.5 (2.3, 2.8)           | 1.4 (1.2, 1.7)       | 1.69 (1.63, 1.76)                   | 1.32 (1.27, 1.38) |
|                                                                      | Most deprived                                     | 0.8 (0.5, 1.1)           | 0.5 (0.2, 0.7)       | 1.24 (1.16, 1.32)                   | 1.14 (1.07, 1.20) |
| Post-discharge mortality (per 10,000 infants)                        | Teenage mothers                                   | 11.1 (8.6, 13.6)         | 10.2 (7.5, 12.9)     | 2.59 (2.20, 3.05)                   | 2.68 (2.21, 3.27) |
|                                                                      | Prior teenage mothers                             | 6.9 (5.2, 8.6)           | 3.3 (1.3, 5.2)       | 1.87 (1.65, 2.13)                   | 1.22 (1.03, 1.44) |
|                                                                      | History of adversity                              | 9.0 (5.8, 12.3)          | 4.3 (0.9, 7.7)       | 2.10 (1.72, 2.56)                   | 1.39 (1.08, 1.79) |
|                                                                      | History of mental health / behavioural conditions | 10.5 (6.9, 14.2)         | 6.5 (2.5, 10.5)      | 2.29 (1.87, 2.80)                   | 1.68 (1.29, 2.18) |
|                                                                      | Most deprived                                     | 5.4 (4.2, 6.6)           | 3.7 (2.5, 4.9)       | 1.77 (1.59, 1.97)                   | 1.49 (1.33, 1.68) |

<sup>^</sup>Adjusted for all maternal risk-factors, ethnic group, and parity. <sup>§</sup>Relative risk for birthweight is for low birth weight (<2500g). <sup>+</sup>Including mortality

**Appendix Table 6: Sensitivity analysis using complete case analysis: Crude and adjusted<sup>^</sup> risk differences and relative risks for birth weight, and unplanned injury admissions and mortality within 12 months of postnatal discharge.** Comparisons are between mothers with each risk-factor identified in the two years prior to 20 weeks of pregnancy, and mothers without that specific risk-factor.

|                                                                      |                                                   | Risk difference (95% CI) |                      | Relative risk <sup>§</sup> (95% CI) |                   |
|----------------------------------------------------------------------|---------------------------------------------------|--------------------------|----------------------|-------------------------------------|-------------------|
| <i>Birth outcomes (N = 2,137,103)</i>                                |                                                   | Crude                    | Adjusted             | Crude                               | Adjusted          |
| Birth weight (grams)                                                 | Teenage mothers                                   | 129.5 (122.0, 137.1)     | 89.0 (82.9, 95.1)    | 1.46 (1.40, 1.52)                   | 1.21 (1.17, 1.26) |
|                                                                      | Prior teenage mothers                             | 39.4 (33.1, 45.8)        | 63.6 (57.9, 69.3)    | 1.22 (1.19, 1.25)                   | 1.32 (1.29, 1.36) |
|                                                                      | History of adversity                              | 102.4 (91.9, 112.8)      | 61.9 (53.0, 70.8)    | 1.65 (1.58, 1.71)                   | 1.34 (1.28, 1.39) |
|                                                                      | History of mental health / behavioural conditions | 140.7 (131.8, 149.6)     | 128.6 (121.1, 136.2) | 1.83 (1.77, 1.89)                   | 1.62 (1.56, 1.68) |
|                                                                      | Most deprived                                     | 96.4 (86.2, 106.5)       | 60.4 (55.0, 65.8)    | 1.43 (1.39, 1.48)                   | 1.32 (1.28, 1.36) |
| <i>Outcomes in 12 months from postnatal discharge (N=2,129,227 )</i> |                                                   |                          |                      |                                     |                   |
| Unplanned injury admissions <sup>+</sup> (%)                         | Teenage mothers                                   | 3.7 (3.4, 4.0)           | 3.6 (3.3, 3.9)       | 2.20 (2.11, 2.29)                   | 2.18 (2.09, 2.27) |
|                                                                      | Prior teenage mothers                             | 2.0 (1.9, 2.2)           | 0.6 (0.5, 0.8)       | 1.57 (1.53, 1.62)                   | 1.09 (1.06, 1.12) |
|                                                                      | History of adversity                              | 2.4 (2.2, 2.7)           | 1.1 (0.9, 1.3)       | 1.66 (1.60, 1.73)                   | 1.24 (1.19, 1.28) |
|                                                                      | History of mental health / behavioural conditions | 2.5 (2.3, 2.8)           | 1.4 (1.2, 1.7)       | 1.69 (1.63, 1.76)                   | 1.32 (1.27, 1.38) |
|                                                                      | Most deprived                                     | 0.9 (0.6, 1.2)           | 0.5 (0.3, 0.8)       | 0.76 (1.16, 1.33)                   | 1.14 (1.08, 1.21) |
| Post-discharge mortality (per 10,000 infants)                        | Teenage mothers                                   | 11.1 (8.6, 13.6)         | 10.2 (7.5, 13.3)     | 2.59 (2.20, 3.05)                   | 2.69 (2.21, 3.27) |
|                                                                      | Prior teenage mothers                             | 6.9 (5.2, 8.6)           | 3.3 (1.3, 5.3)       | 1.96 (1.73, 2.23)                   | 1.22 (1.03, 1.44) |
|                                                                      | History of adversity                              | 9.0 (5.8, 12.3)          | 4.3 (0.9, 7.7)       | 2.20 (1.80, 2.69)                   | 1.39 (1.08, 1.79) |
|                                                                      | History of mental health / behavioural conditions | 10.5 (6.9, 14.2)         | 6.5 (2.5, 10.5)      | 2.39 (1.96, 2.92)                   | 1.68 (1.29, 2.18) |
|                                                                      | Most deprived                                     | 5.4 (4.2, 6.6)           | 3.7 (2.5, 4.9)       | 1.70 (1.52, 1.91)                   | 1.49 (1.32, 1.68) |

<sup>^</sup>Adjusted for all maternal risk-factors, ethnic group, and parity. <sup>§</sup>Relative risk for birthweight is for low birth weight (<2500g). <sup>+</sup>Including mortality.
